# Supplementary material
Source: PubMed Central journal article supplement (PMC3578566)

Site 1

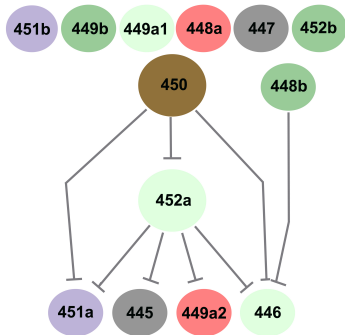

Site 2

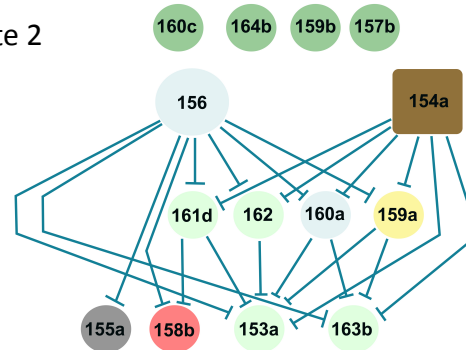

Site 3

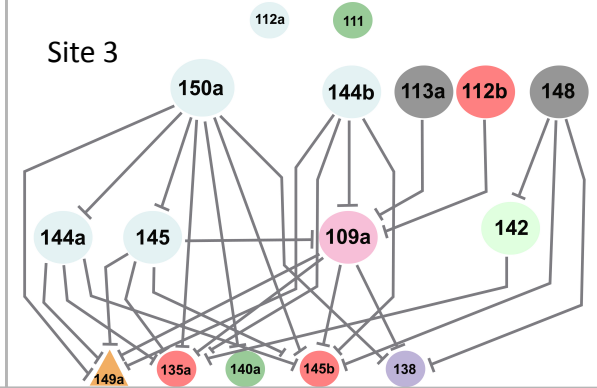

Site 4

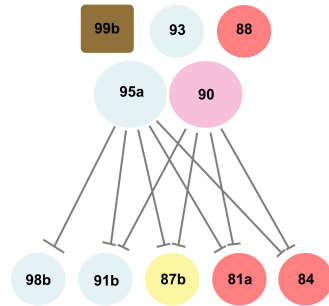

Site 5

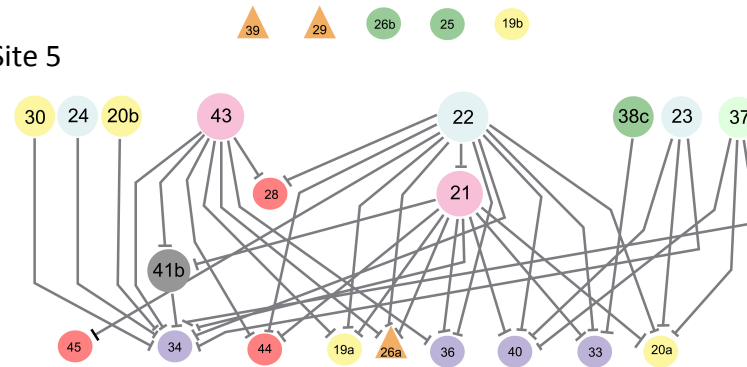

Supplement: ismej2012119x1.pdf [file ismej2012119x1.pdf]
